# Supplementary material for: Birth Size and Breast Cancer Risk: Re-analysis of Individual Participant Data from 32 Studies
Source: PLOS journal article supplement (doi:10.1371/journal.pmed.0050193), 2008-09-26
Supplement: S3 (10.1371/journal.pmed.0050193.s003) [file journal.pmed.0050193.s003]

## Ponderal index (per 2.5 kg/m<sup>3</sup> increment)

(3,614 cases / 412,917 non-cases)

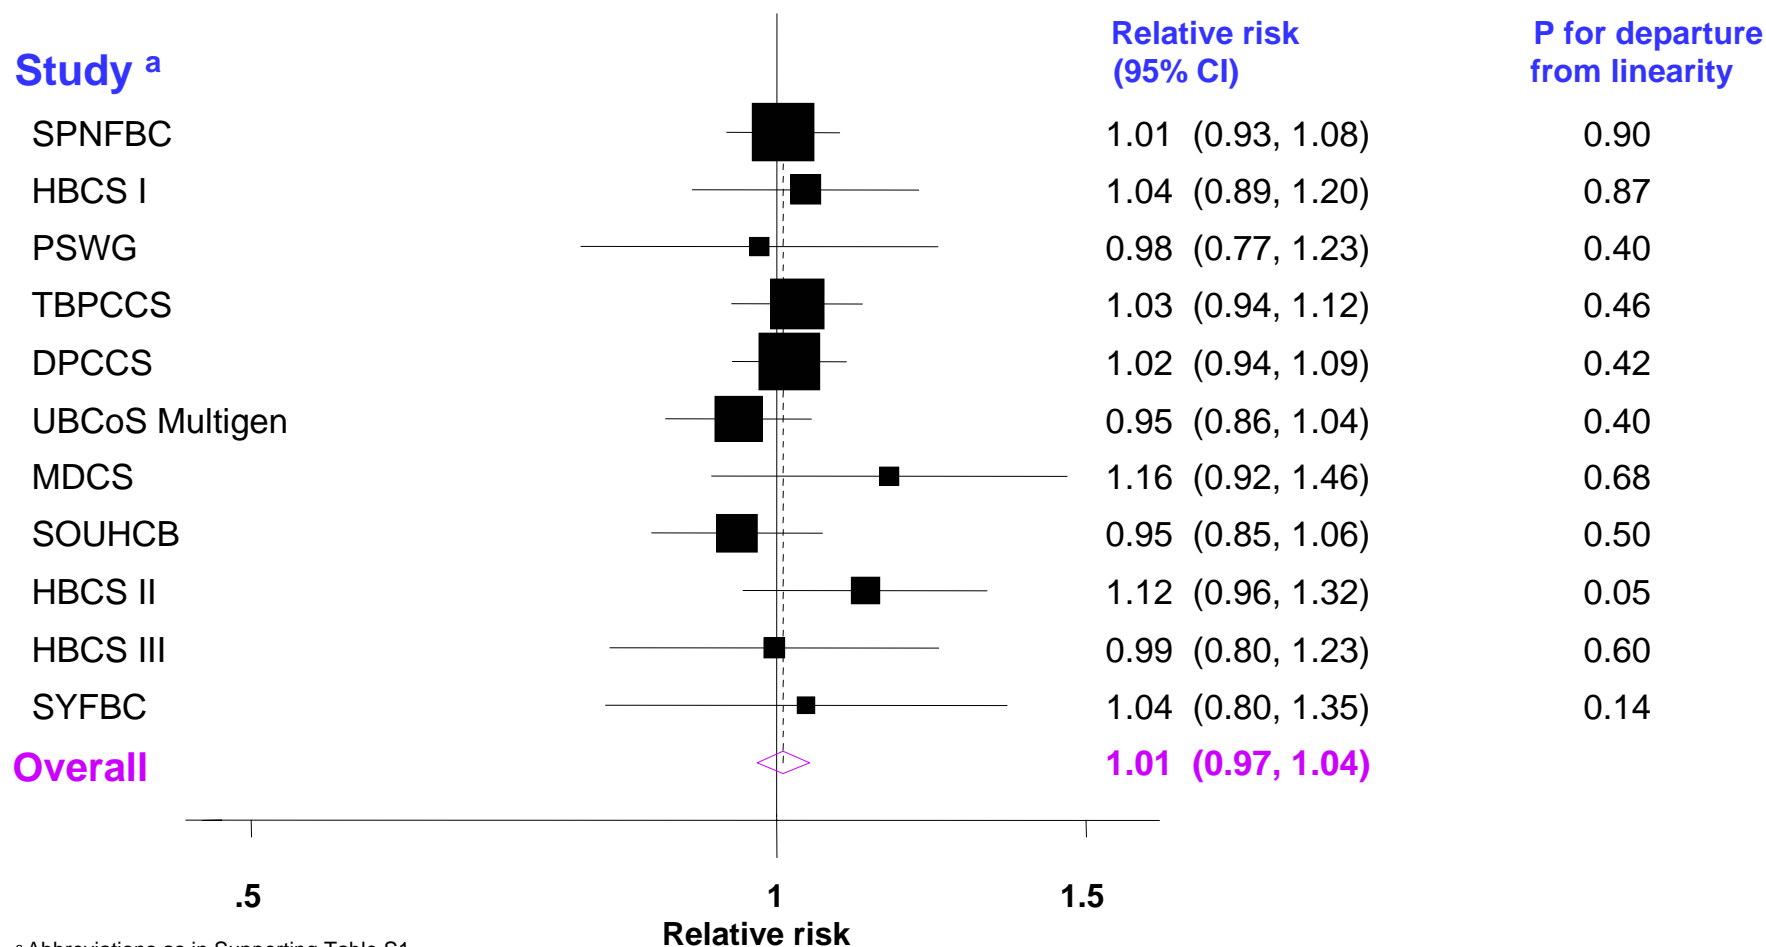

<sup>a</sup> Abbreviations as in Supporting Table S1

Within study design heterogeneity: P=0.66 (I<sup>2</sup>=0%) for cohort studies; P=0.95 (I<sup>2</sup>=0%) for individually matched case-control studies (only 1 nested case-control study - MDCS)

Between study design heterogeneity: P=0.38
