# Supplementary material for: Birth Size and Breast Cancer Risk: Re-analysis of Individual Participant Data from 32 Studies
Source: PLOS journal article supplement (doi:10.1371/journal.pmed.0050193), 2008-09-26
Supplement: S4 (10.1371/journal.pmed.0050193.s004) [file journal.pmed.0050193.s004]

**Table S4.** Study-specific breast cancer relative risks by categories of birth weight

| **Study type** | **Study a** | **Category (kg)** | **RR b** | **95% CI c** | | **P for linear trend** |
| --- | --- | --- | --- | --- | --- | --- |
|  |  |  |  |  |  |  |
| **Cohort** | MRC NSHD | <2.5 | 0.68 | 0.16, 2.86 | | 0.44 |
|  |  | 2.5- | 1.01 | 0.55, 1.84 | |  |
|  |  | 3- *(baseline)* | 1 |  |  |  |
|  |  | 3.5- | 1.22 | 0.72, 2.05 | |  |
|  |  | ≥ 4 | 1.06 | 0.44, 2.55 | |  |
|  | HBCS I | <2.5 | 0.65 | 0.28, 1.49 | | 0.25 |
|  |  | 2.5- | 0.60 | 0.37, 0.97 | |  |
|  |  | 3- *(baseline)* | 1 |  |  |  |
|  |  | 3.5- | 0.86 | 0.60, 1.23 | |  |
|  |  | ≥ 4 | 0.93 | 0.54, 1.59 | |  |
|  | PSWG | <2.5 | 0.56 | 0.07, 4.33 | | 0.12 |
|  |  | 2.5- | 0.0 | 0, ∞ | |  |
|  |  | 3- *(baseline)* | 1 |  |  |  |
|  |  | 3.5- | 1.06 | 0.49, 2.27 | |  |
|  |  | ≥ 4 | 0.99 | 0.43, 2.26 | |  |
|  | CSHRR | <2.5 | 0.96 | 0.82, 1.14 | | 0.45 |
|  |  | 2.5- | 0.98 | 0.87, 1.09 | |  |
|  |  | 3- *(baseline)* | 1 |  |  |  |
|  |  | 3.5- | 1.01 | 0.93, 1.11 | |  |
|  |  | ≥ 4 | 1.01 | 0.90, 1.14 | |  |
|  | UBCoS Multigen | <2.5 | 1.03 | 0.60, 1.79 | | 0.30 |
|  |  | 2.5- | 1.14 | 0.83, 1.55 | |  |
|  |  | 3- *(baseline)* | 1 |  |  |  |
|  |  | 3.5- | 1.28 | 1.01, 1.62 | |  |
|  |  | ≥ 4 | 1.15 | 0.81, 1.63 | |  |
|  | SOUHCB | <2.5 | 0.77 | 0.38, 1.57 | | 0.37 |
|  |  | 2.5- | 0.90 | 0.62, 1.30 | |  |
|  |  | 3- *(baseline)* | 1 |  |  |  |
|  |  | 3.5- | 1.10 | 0.85, 1.42 | |  |
|  |  | ≥ 4 | 0.96 | 0.66, 1.40 | |  |
|  | NCI DES | <2.5 | 0.99 | 0.55, 1.78 | | 0.73 |
|  |  | 2.5- | 0.68 | 0.42, 1.11 | |  |
|  |  | 3- *(baseline)* | 1 |  |  |  |
|  |  | 3.5- | 0.95 | 0.60, 1.50 | |  |
|  |  | ≥ 4 | 0.73 | 0.29, 1.82 | |  |
|  | UKWCS | <2.5 | 1.15 | 0.83, 1.58 | | 0.74 |
|  |  | 2.5- | 1.14 | 0.86, 1.52 | |  |
|  |  | 3- *(baseline)* | 1 |  | |  |
|  |  | 3.5- | 1.05 | 0.80, 1.38 | |  |
|  |  | ≥ 4 | 1.27 | 0.94, 1.71 | |  |
|  | ACONF | <2.5 | 0.76 | 0.23, 2.49 | | 0.61 |
|  |  | 2.5- | 0.79 | 0.39, 1.59 | |  |
|  |  | 3- *(baseline)* | 1 |  |  |  |
|  |  | 3.5- | 0.94 | 0.54, 1.65 | |  |
|  |  | ≥ 4 | 0.98 | 0.30, 3.23 | |  |
|  |  |  |  |  | |  |
|  | EPIC-Norfolk | <2.5 | 1.17 | 0.77, 1.76 | | 0.02 |
|  |  | 2.5- | 0.96 | 0.64, 1.44 | |  |
|  |  | 3- *(baseline)* | 1 |  |  |  |
|  |  | 3.5- | 0.69 | 0.46, 1.04 | |  |
|  |  | ≥ 4 | 0.73 | 0.47, 1.11 | |  |
|  |  |  |  |  | |  |
|  |  |  |  |  | |  |
|  | HBCS II | <2.5 | 0.42 | 0.13, 1.34 | | 0.78 |
|  |  | 2.5- | 0.98 | 0.67, 1.43 | |  |
|  |  | 3- *(baseline)* | 1 |  | |  |
|  |  | 3.5- | 0.85 | 0.60, 1.19 | |  |
|  |  | ≥ 4 | 1.05 | 0.61, 1.82 | |  |
|  | HBCS III | <2.5 | 0.77 | 0.19, 3.19 | | 0.68 |
|  |  | 2.5- | 1.22 | 0.70, 2.15 | |  |
|  |  | 3- *(baseline)* | 1 |  | |  |
|  |  | 3.5- | 1.35 | 0.86, 2.13 | |  |
|  |  | ≥ 4 | 0.95 | 0.43, 2.14 | |  |
|  | SYFBC | <2.5 | 0 | 0, ∞ | | 0.02 |
|  |  | 2.5- | 0.93 | 0.34, 2.57 | |  |
|  |  | 3- *(baseline)* | 1 |  | |  |
|  |  | 3.5- | 1.00 | 0.48, 2.11 | |  |
|  |  | ≥ 4 | 2.41 | 1.13, 5.15 | |  |
| **Nested** | NHS I | <2.5 | 1.00 | 0.88, 1.14 | | 0.44 |
| **case-control** |  | 2.5- | 1.01 | 0.93, 1.10 | |  |
|  |  | 3- *(baseline)* | 1 |  | |  |
|  |  | 3.5- | 0.91 | 0.81, 1.02 | |  |
|  |  | ≥ 4 | 1.08 | 0.87, 1.35 | |  |
|  | NHS II | <2.5 | 1.03 | 0.79, 1.34 | | 0.20 |
|  |  | 2.5- | 0.98 | 0.84, 1.14 | |  |
|  |  | 3- *(baseline)* | 1 |  | |  |
|  |  | 3.5- | 1.18 | 0.97, 1.43 | |  |
|  |  | ≥ 4 | 1.17 | 0.68, 1.99 | |  |
|  | MDCS | <2.5 | 0.73 | 0.19, 2.76 | | 0.22 |
|  |  | 2.5- | 0.75 | 0.35, 1.61 | |  |
|  |  | 3- *(baseline)* | 1 |  | |  |
|  |  | 3.5- | 1.26 | 0.69, 2.31 | |  |
|  |  | ≥ 4 | 1.14 | 0.56, 2.32 | |  |
| **Ind. matched** | SPNFBC | <2.5 | 0.93 | 0.63, 1.38 | | 0.41 |
| **case-control** |  | 2.5- | 0.94 | 0.75, 1.19 | |  |
|  |  | 3- *(baseline)* | 1 |  | |  |
|  |  | 3.5- | 0.98 | 0.82, 1.17 | |  |
|  |  | ≥ 4 | 1.08 | 0.85, 1.37 | |  |
|  | NYSEOBC | <2.5 | 0.80 | 0.16, 3.85 | | 0.22 |
|  |  | 2.5- | 0.57 | 0.18, 1.85 | |  |
|  |  | 3- *(baseline)* | 1 |  |  |  |
|  |  | 3.5- | 1.62 | 0.67, 3.88 | |  |
|  |  | ≥ 4 | 0.82 | 0.15, 4.40 | |  |
|  |  |  |  |  | |  |
|  |  |  |  |  | |  |
|  |  |  |  |  | |  |
|  | TBPCCS | <2.5 | 0.92 | 0.48, 1.75 | | 0.03 |
|  |  | 2.5- | 0.95 | 0.65, 1.38 | |  |
|  |  | 3- *(baseline)* | 1 |  |  |  |
|  |  | 3.5- | 1.32 | 1.00, 1.75 | |  |
|  |  | ≥ 4 | 1.28 | 0.87, 1.89 | |  |
|  | DPCCS | <2.5 | 1.64 | 1.03, 2.60 | | 0.17 |
|  |  | 2.5- | 0.83 | 0.63, 1.10 | |  |
|  |  | 3- *(baseline)* | 1 |  |  |  |
|  |  | 3.5- | 0.99 | 0.82, 1.19 | |  |
|  |  | ≥ 4 | 1.25 | 1.01, 1.55 | |  |
| **Freq. matched** | Seattle BCYW | <2.5 | 1.20 | 0.81, 1.80 | | 0.58 |
| **case-control** |  | 2.5- | 0.79 | 0.60, 1.05 | |  |
|  |  | 3- *(baseline)* | 1 |  |  |  |
|  |  | 3.5- | 0.91 | 0.68, 1.21 | |  |
|  |  | ≥ 4 | 1.18 | 0.80, 1.75 | |  |
|  | Seattle BCMW | <2.5 | 0.95 | 0.57, 1.59 | | 0.10 |
|  |  | 2.5- | 0.99 | 0.66, 1.48 | |  |
|  |  | 3- *(baseline)* | 1 |  |  |  |
|  |  | 3.5- | 0.77 | 0.51, 1.16 | |  |
|  |  | ≥ 4 | 0.66 | 0.41, 1.05 | |  |
|  | Seattle PFBC | <2.5 | 1.30 | 0.73, 2.33 | | 0.95 |
|  |  | 2.5- | 1.01 | 0.69, 1.47 | |  |
|  |  | 3- *(baseline)* | 1 |  |  |  |
|  |  | 3.5- | 1.00 | 0.70, 1.42 | |  |
|  |  | ≥ 4 | 1.25 | 0.73, 2.17 | |  |
|  | SBCS | <2.5 | 0.77 | 0.36, 1.65 | | 0.28 |
|  |  | 2.5- | 0.92 | 0.60, 1.42 | |  |
|  |  | 3- *(baseline)* | 1 |  |  |  |
|  |  | 3.5- | 0.69 | 0.42, 1.14 | |  |
|  |  | ≥ 4 | 0.62 | 0.32, 1.18 | |  |
|  | SBCS | <2.5 | 1.13 | 0.91, 1.41 | | 0.85 |
|  |  | 2.5- | 0.90 | 0.74, 1.09 | |  |
|  |  | 3- *(baseline)* | 1 |  |  |  |
|  |  | 3.5- | 1.06 | 0.88, 1.29 | |  |
|  |  | ≥ 4 | 1.03 | 0.85, 1.25 | |  |
|  | CBCS | <2.5 | 0.93 | 0.41, 2.09 | | 0.40 |
|  |  | 2.5- | 0.86 | 0.48, 1.55 | |  |
|  |  | 3- *(baseline)* | 1 |  |  |  |
|  |  | 3.5- | 0.80 | 0.45, 1.44 | |  |
|  |  | ≥ 4 | 0.56 | 0.24, 1.28 | |  |
|  | WEB | <2.5 | 1.30 | 0.93, 1.81 | | 0.28 |
|  |  | 2.5- | 1.06 | 0.78, 1.44 | |  |
|  |  | 3- *(baseline)* | 1 |  |  |  |
|  |  | 3.5- | 0.90 | 0.75, 1.07 | |  |
|  |  | ≥ 4 | 1.12 | 0.87, 1.44 | |  |
|  | PBCS | <2.5 | 0.84 | 0.63, 1.14 | | 0.02 |
|  |  | 2.5- (baseline) | 1 |  | |  |
|  |  | ≥ 4 | 1.28 | 1.02, 1.61 | |  |
|  |  |  |  |  | |  |
|  |  |  |  |  | |  |
|  | CARE | <2.5 | 1.06 | 0.89, 1.27 | | 0.19 |
|  |  | 2.5- | 0.93 | 0.81, 1.06 | |  |
|  |  | 3- *(baseline)* | 1 |  |  |  |
|  |  | 3.5- | 0.93 | 0.80, 1.07 | |  |
|  |  | ≥ 4 | 0.87 | 0.72, 1.06 | |  |
| **Twins** | SLST | <2.133 | 0.37 | 0.12, 1.21 | | 0.12 |
|  |  | 2.133- *(baseline)* | 1 |  | |  |
|  |  | 2.510- | 0.77 | 0.32, 1.87 | |  |
|  |  | ≥2.795 | 1.38 | 0,52, 3.69 | |  |
|  | SOSTS | <2.180 | 0.64 | 0.23, 1.76 | | 0.02 |
|  |  | 2.180- *(baseline)* | 1 |  | |  |
|  |  | 2.540- | 1.22 | 0.50, 2.98 | |  |
|  |  | 2.850- | 1.72 | 0.75, 3.95 | |  |
| **Premature/low** | SPVLBW | <1.800 | 1.63 | 0.71, 3.71 | | 0.74 |
| **Birth weight** |  | 1.800- *(baseline)* | 1 |  | |  |
|  |  | 2.030- | 0.98 | 0.39, 2.46 | |  |
|  |  | 2.410- | 1.44 | 0.63, 3.34 | |  |
|  |  |  |  |  | |  |

a Study abbreviations as in Supporting Table S1

b Minimally adjusted relative risks (see text - Statistical Methods section)

c 95% confidence interval
