# Supplementary material for: Birth Size and Breast Cancer Risk: Re-analysis of Individual Participant Data from 32 Studies
Source: PLOS journal article supplement (doi:10.1371/journal.pmed.0050193), 2008-09-26
Supplement: S6 (10.1371/journal.pmed.0050193.s006) [file journal.pmed.0050193.s006]

**Table S6.** Study-specific breast cancer relative risks by fourths of ponderal index

| **Study Type** | **Study *** | **Categories**  (kg / m)3 | **RR **** | **95% CI ***** | | **P for linear trend** |
| --- | --- | --- | --- | --- | --- | --- |
|  |  |  |  |  | |  |
| **Cohort** | HBCS I | <25.6 | 0.91 | 0.62, 1.34 | | 0.66 |
|  |  | 25.6- *(baseline)* | 1 |  |  |  |
|  |  | 27.2- | 0.71 | 0.46, 1.10 | |  |
|  |  | ≥ 28.8 | 0.93 | 0.61, 1.40 | |  |
|  | PSWG | <25.6 | 3.27 | 0.69, 15.44 | | 0.80 |
|  |  | 25.6- *(baseline)* | 1 |  |  |  |
|  |  | 27.2- | 3.83 | 0.77, 19.03 | |  |
|  |  | ≥ 28.8 | 2.95 | 0.62, 14.02 | |  |
|  | UBCoS Multigen | <25.6 | 0.97 | 0.75, 1.26 | | 0.74 |
|  |  | 25.6- *(baseline)* | 1 |  |  |  |
|  |  | 27.2- | 1.13 | 0.85, 1.50 | |  |
|  |  | ≥ 28.8 | 0.82 | 0.59, 1.15 | |  |
|  | SOUHCB | *<25.6* | 1.09 | 0.81, 1.46 | | 0.51 |
|  |  | *25.6- (baseline)* | 1 |  |  |  |
|  |  | 27.2- | 1.00 | 0.72, 1.38 | |  |
|  |  | ≥ 28.8 | 0.98 | 0.70, 1.36 | |  |
|  | HBCS II | <25.6 | 0.77 | 0.53, 1.12 | | 0.19 |
|  |  | 25.6- *(baseline)* | 1 |  |  |  |
|  |  | 27.2- | 1.18 | 0.82, 1.69 | |  |
|  |  | ≥ 28.8 | 0.90 | 0.58, 1.41 | |  |
|  | HBCS III | <25.6 | 1.10 | 0.64, 1.91 | | 0.81 |
|  |  | 25.6- *(baseline)* | 1 |  |  |  |
|  |  | 27.2- | 1.52 | 0.91, 2.53 | |  |
|  |  | ≥ 28.8 | 0.95 | 0.51, 1.77 | |  |
|  | SYFBC | <25.6 | 0.59 | 0.26, 1.35 | | 0.91 |
|  |  | 25.6- *(baseline)* | 1 |  |  |  |
|  |  | 27.2- | 0.65 | 0.30, 1.44 | |  |
|  |  | ≥ 28.8 | 0.68 | 0.31, 1.49 | |  |
| **Nested** | MDCS | <25.6 | 0.69 | 0.36, 1.30 | | 0.25 |
| **case-control** |  | 25.6- *(baseline)* | 1 |  |  |  |
|  |  | 27.2- | 1.44 | 0.63, 3.26 | |  |
|  |  | ≥ 28.8 | 0.67 | 0.23, 1.95 | |  |
| **Ind. matched** | SPNFBC | <25.6 | 0.96 | 0.79, 1.15 | | 0.76 |
| **case-control** |  | 25.6- *(baseline)* | 1 |  |  |  |
|  |  | 27.2- | 0.95 | 0.76, 1.19 | |  |
|  |  | ≥ 28.8 | 0.92 | 0.72, 1.17 | |  |
|  | TBPCCS | <25.6 | 1.01 | 0.73, 1.39 | | 0.96 |
|  |  | 25.6- *(baseline)* | 1 |  |  |  |
|  |  | 27.2- | 1.06 | 0.76, 1.49 | |  |
|  |  | ≥ 28.8 | 1.00 | 0.72, 1.40 | |  |
|  | DPCCS | <25.6 | 0.87 | 0.72, 1.06 | | 0.50 |
|  |  | 25.6- *(baseline)* | 1 |  |  |  |
|  |  | 27.2- | 0.77 | 0.58, 1.02 | |  |
|  |  | ≥ 28.8 | 1.06 | 0.76, 1.46 | |  |
|  |  |  |  |  | |  |
|  |  |  |  |  | |  |
|  |  |  |  |  | |  |
|  |  |  |  |  | |  |
|  |  |  |  |  | |  |
|  |  |  |  |  | |  |
|  |  |  |  |  | |  |
|  |  |  |  |  | |  |
| **Twins** | SLSTS | <21.7 | 0.52 | 0.19, 1.45 | | 0.08 |
|  |  | 21.7- *(baseline)* | 1 |  |  |  |
|  |  | 23.6- | 1.43 | 0.51, 3.98 | |  |
|  |  | ≥ 25.5 | 1.74 | 0.59, 5.08 | |  |
|  | SOSTS | <23.0 | 1.19 | 0.42, 3.43 | | 0.24 |
|  |  | 23.0- *(baseline)* | 1 |  |  |  |
|  |  | 24.4- | 1.51 | 0.58, 3.89 | |  |
|  |  | ≥ 25.9 | 1.76 | 0.70, 4.43 | |  |
| **Premature/low** | SPVLBW | <21.8 | 1.31 | 0.60, 2.89 | | 0.59 |
| **birth weight** |  | 21.8- *(baseline)* | 1 |  |  |  |
|  |  | 23.4- | 0.72 | 0.29, 1.79 | |  |
|  |  | ≥ 25.2 | 1.15 | 0.51, 2.56 | |  |
|  |  |  |  |  |  |  |

a Study abbreviations as in Supporting Table S1

b Minimally adjusted relative risks (see text - Statistical Methods section)

c 95% confidence interval
