# Supplementary material for: Birth Size and Breast Cancer Risk: Re-analysis of Individual Participant Data from 32 Studies
Source: PLOS journal article supplement (doi:10.1371/journal.pmed.0050193), 2008-09-26
Supplement: S7 (10.1371/journal.pmed.0050193.s007) [file journal.pmed.0050193.s007]

**Table S7**. Study specific relative risks of breast cancer by fourths of head circumference

| **Study Type** | **Study a** | **Category (cm)** | **RR b** | **95% CI c** | | **P for linear trend** |
| --- | --- | --- | --- | --- | --- | --- |
|  |  |  |  |  |  |  |
| **Cohort** | HBCS I | <33 | 1.09 | 0.59, 2.03 | | 0.04 |
|  |  | 33- *(baseline)* | 1 |  |  |  |
|  |  | 34- | 1.06 | 0.65, 1.71 | |  |
|  |  | ≥ 35 | 1.52 | 0.98, 2.36 | |  |
|  | PSWG | <33 | 0 | 0, ∞ | | 0.36 |
|  |  | 33- *(baseline)* | 1 |  |  |  |
|  |  | 34- | 0.58 | 0.12, 2.87 | |  |
|  |  | ≥ 35 | 0.91 | 0.24, 3.42 | |  |
|  | UBCoS Multigen | <33 | 1.05 | 0.69, 1.61 | | 0.40 |
|  |  | 33- *(baseline)* | 1 |  |  |  |
|  |  | 34- | 0.94 | 0.69, 1.29 | |  |
|  |  | ≥ 35 | 1.13 | 0.85, 1.51 | |  |
|  | SOUHCB | <33 | 0.76 | 0.42, 1.38 | | 0.44 |
|  |  | 33- *(baseline)* | 1 |  |  |  |
|  |  | 34- | 0.92 | 0.62, 1.36 | |  |
|  |  | ≥ 35 | 0.99 | 0.70, 1.41 | |  |
|  | HBCS II | <33 | 0.66 | 0.30, 1.44 | | 0.97 |
|  |  | 33- *(baseline)* | 1 |  |  |  |
|  |  | 34- | 1.02 | 0.65, 1.60 | |  |
|  |  | ≥ 35 | 0.89 | 0.59, 1.35 | |  |
|  | HBCS III | <33 | 0.94 | 0.38, 2.29 | | 0.69 |
|  |  | 33- *(baseline)* | 1 |  |  |  |
|  |  | 34- | 1.25 | 0.68, 2.28 | |  |
|  |  | ≥ 35 | 1.10 | 0.61, 1.98 | |  |
|  | SYFBC | <33 | 0.31 | 0.07, 1.43 | | 0.24 |
|  |  | 33- *(baseline)* | 1 |  |  |  |
|  |  | 34- | 0.57 | 0.23, 1.41 | |  |
|  |  | ≥ 35 | 0.95 | 0.46, 1.99 | |  |
| **Nested** | MDCS | <33 | 1.31 | 0.40, 4.31 | | 0.83 |
| **case-control** |  | 33- *(baseline)* | 1 |  |  |  |
|  |  | 34- | 1.00 | 0.40, 2.50 | |  |
|  |  | ≥ 35 | 1.21 | 0.52, 2.79 | |  |
| **Ind. matched** | TBPCCS | <33 | 0.74 | 0.33, 1.62 | | 0.07 |
| **case-control** |  | 33- *(baseline)* | 1 |  |  |  |
|  |  | 34- | 0.98 | 0.56, 1.70 | |  |
|  |  | ≥ 35 | 1.27 | 0.77, 2.11 | |  |
|  |  |  |  |  |  |  |

a Study abbreviations as in Supporting Table S1

b Minimally adjusted relative risks (see text - Statistical Methods section)

c 95% confidence interval
