# Supplementary material for: Birth Size and Breast Cancer Risk: Re-analysis of Individual Participant Data from 32 Studies
Source: PLOS journal article supplement (doi:10.1371/journal.pmed.0050193), 2008-09-26
Supplement: S8 (10.1371/journal.pmed.0050193.s008) [file journal.pmed.0050193.s008]

**Source of birth weight data**

**Age (yrs)** (no. cases / non-cases)

**Birth weigh category (kg) \***

**Birth records**

**<45** (2,104 / 420,874)

<3

3-3.5 (baseline)

>3.5

**45-54** (903 / 38,558)

<3

3-3.5 (baseline)

>3.5

**≥ 55** (982 / 22,468)

<3

3-3.5 (baseline)

>3.5

**Parental recalls in women's childhood**

**<45** (826 / 109,064)

<3

3-3.5 (baseline)

>3.5

**45-54** (1,249 / 65,149)

<3

3-3.5 (baseline)

>3.5

**≥ 55** (812 / 38,387)

<3

3-3.5 (baseline)

>3.5

**Adult reports**

**<45** (3,437 / 7,193)

<3

3-3.5 (baseline)

>3.5

**45-54** (3,192 / 10,362)

<3

3-3.5 (baseline)

>3.5

**≥ 55** (7,714 / 35,417)

<3

3-3.5 (baseline)

>3.5

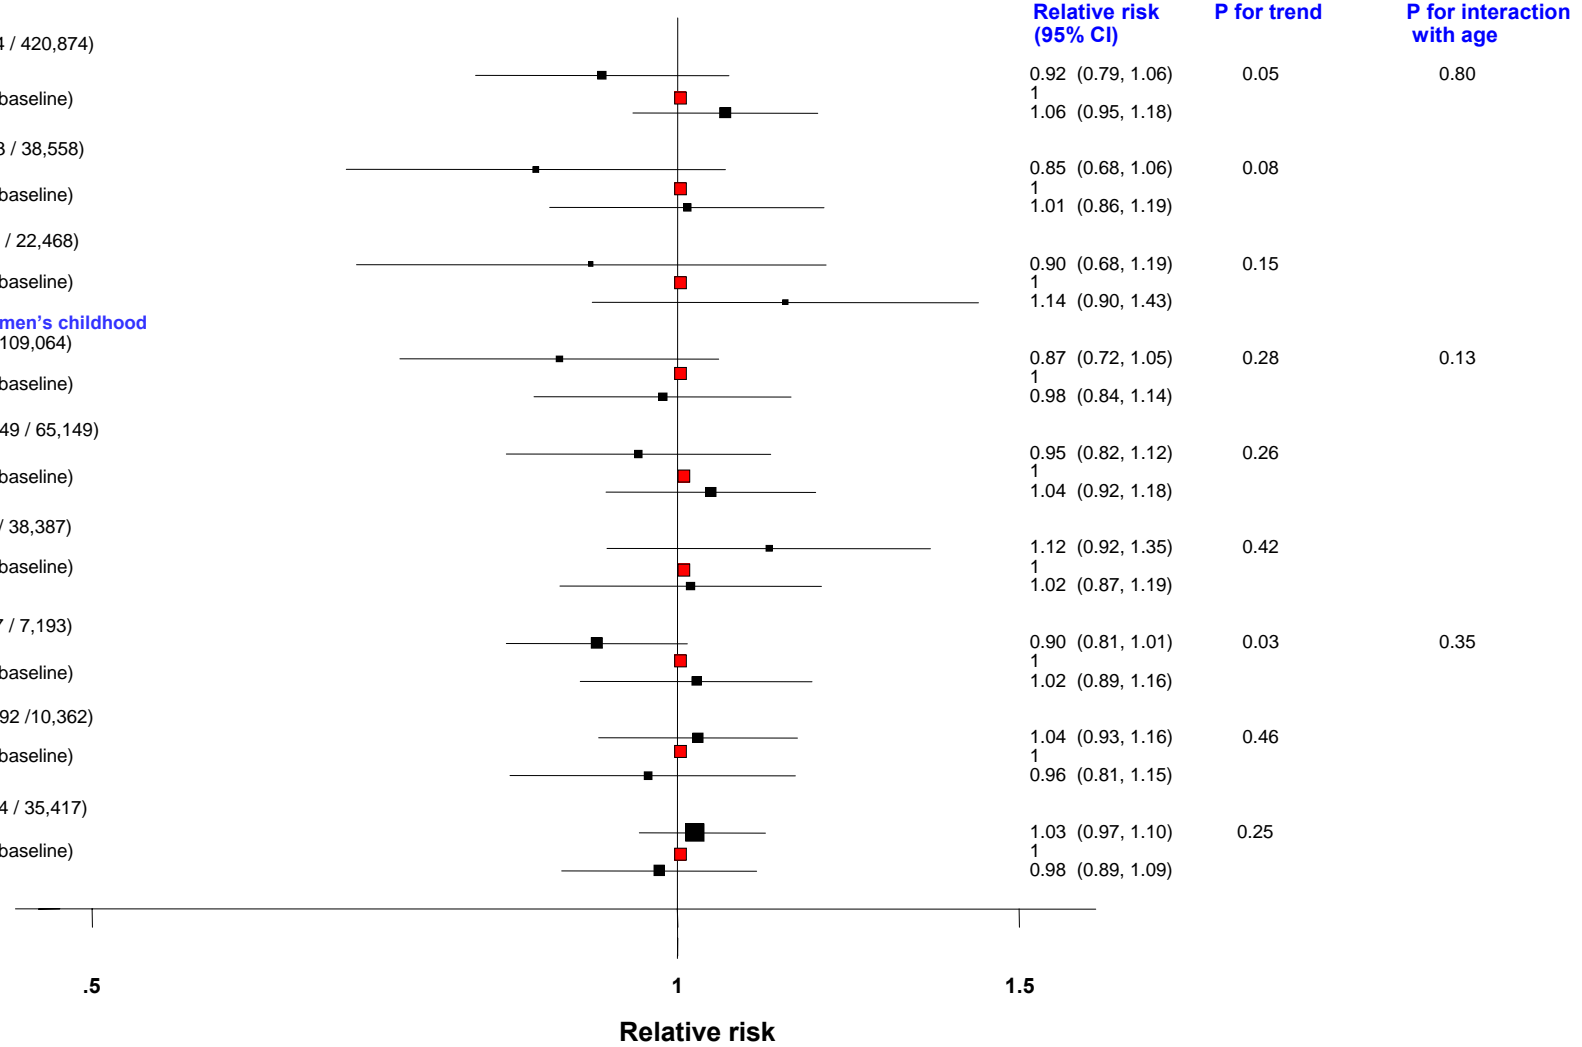

\* Data were collapsed into 3 rather 5 categories because of small number of cases  
Contributing studies as in Supporting Table S8
