# Supplementary figures and images for: Birth Size and Breast Cancer Risk: Re-analysis of Individual Participant Data from 32 Studies
Source: PLOS journal article supplement (doi:10.1371/journal.pmed.0050193), 2008-09-26

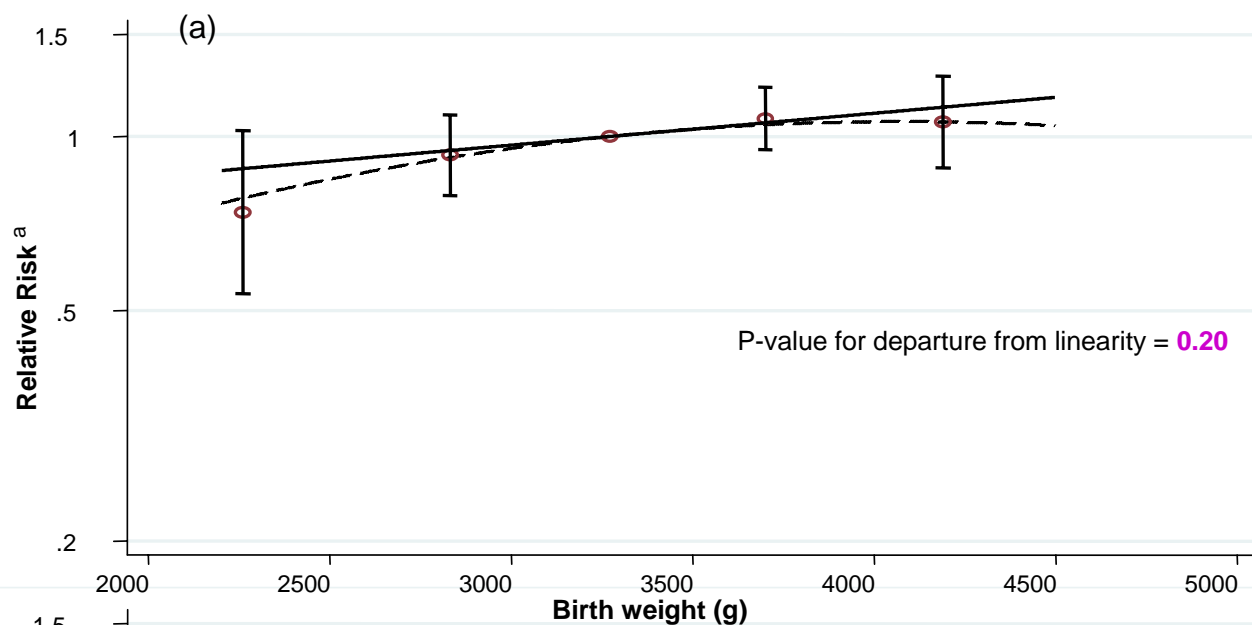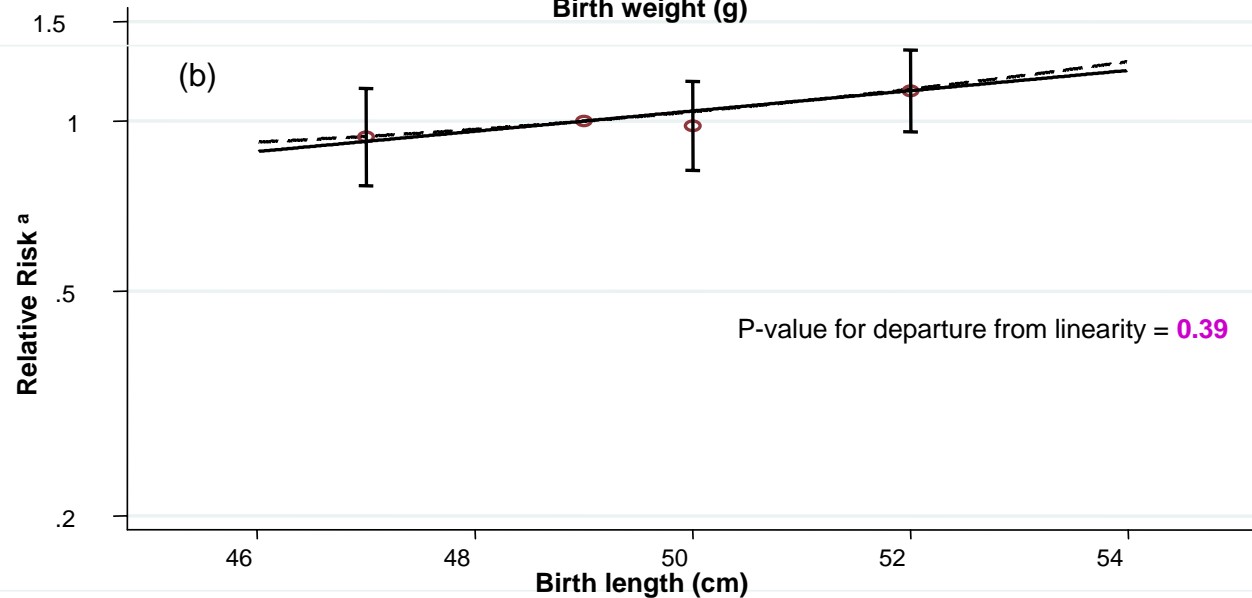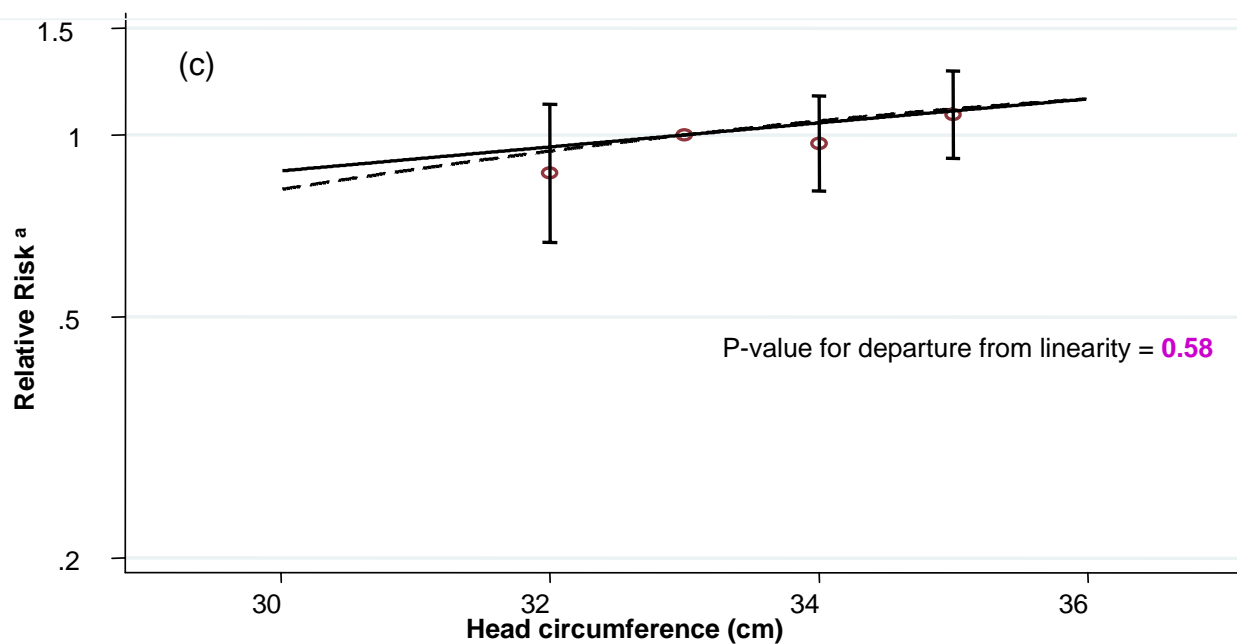

<sup>a</sup> RRs for categorical variables refer to the median values in each category

Supplement: S6 (10.1371/journal.pmed.0050193.s006) [file journal.pmed.0050193.s006]
